# Supplementary material for: Novel ternary transition metal oxide solid solution: mesoporous Ni–Mn–Co–O nanowire arrays as an integrated anode for high-power lithium-ion batteries
Source: Royal Society of Chemistry journal article supplement (doi:10.1039/c8dt04612c), 2019-01-01
Supplement: c8dt04612c1.pdf [file c8dt04612c1.pdf]

**Supporting Information for: Novel Ternary Transition  
Metal Oxide Solid solution: Mesoporous Ni-Mn-Co-O  
Nanowire Arrays as Integrated Anode for High-Power  
Lithium-ion battery**

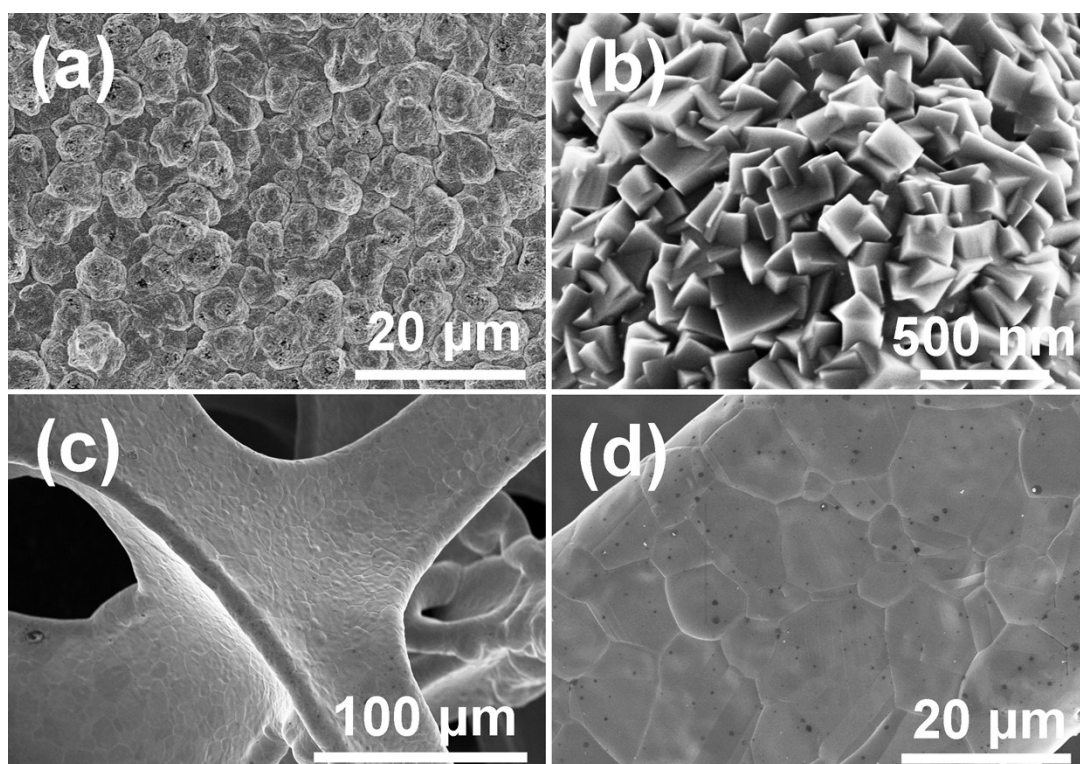

**Fig.S1** (a) Low and (b) high magnification SEM images of Cu foil, and (c) Low and (d) high magnification SEM images of the 3D network structure of Cu foam.

\* In order to improve the adhesion between Cu foil substrate and NMCO nanowires, the Cu foil is annealed at 400 °C for 2 h in Ar atmosphere before hydrothermal, which makes the surface of Cu foil generate an abundant nanostructure plane. The nanostructure plane can provide abundant active sites for nanowire attachment.

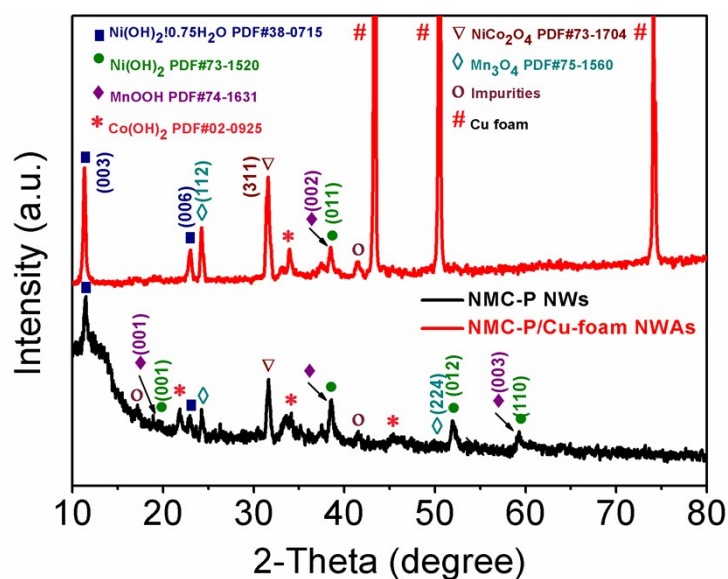

Fig.S2 XRD patterns for two precursors of NMC-P and NMC-P/Cu-foam NWAs.

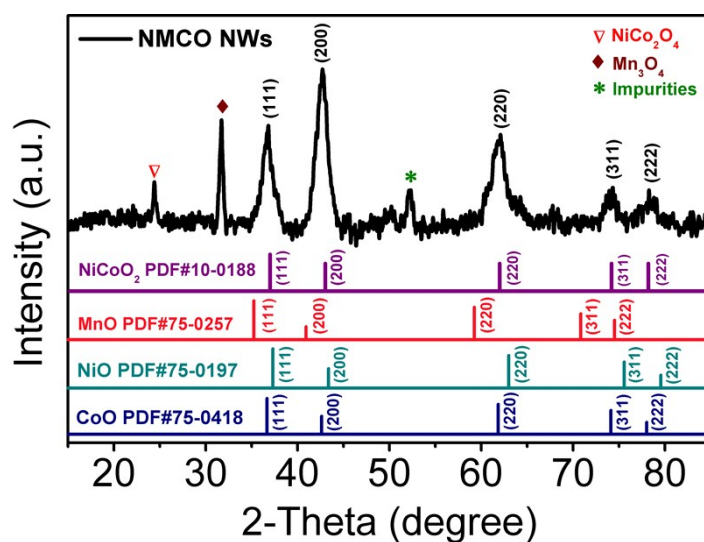

Fig.S3 XRD patterns of the NMCO NWs sample.

Tab.S1 The Crystal parameter for MnO, NiO, CoO, and NiCoO<sub>2</sub>.

| Phase              | PDF card | Space group | (hkl)   | 2-Theta (degree) |        |       |                    | D <sub>hkl</sub> (10 <sup>-1</sup> nm) |       |       |                    |
|--------------------|----------|-------------|---------|------------------|--------|-------|--------------------|----------------------------------------|-------|-------|--------------------|
|                    |          |             |         | MnO              | NiO    | CoO   | NiCoO <sub>2</sub> | MnO                                    | NiO   | CoO   | NiCoO <sub>2</sub> |
| MnO                | 75-0257  | Fm-3m       | (1 1 1) | 35.24            | 37.319 | 36.68 | 36.81              | 2.545                                  | 2.407 | 2.448 | 2.440              |
| NiO                | 75-0197  | Fm-3m       | (2 0 0) | 40.91            | 43.362 | 42.61 | 42.82              | 2.204                                  | 2.085 | 2.120 | 2.110              |
| CoO                | 75-0418  | Fm-3m       | (2 2 0) | 59.24            | 62.995 | 61.84 | 61.79              | 1.558                                  | 1.474 | 1.499 | 1.500              |
| NiCoO <sub>2</sub> | 10-0188  | F           | (3 1 1) | 70.84            | 75.56  | 74.10 | 73.99              | 1.329                                  | 1.257 | 1.278 | 1.280              |
|                    |          |             | (2 2 2) | 74.51            | 79.57  | 78.00 | 77.99              | 1.273                                  | 1.204 | 1.224 | 1.224              |

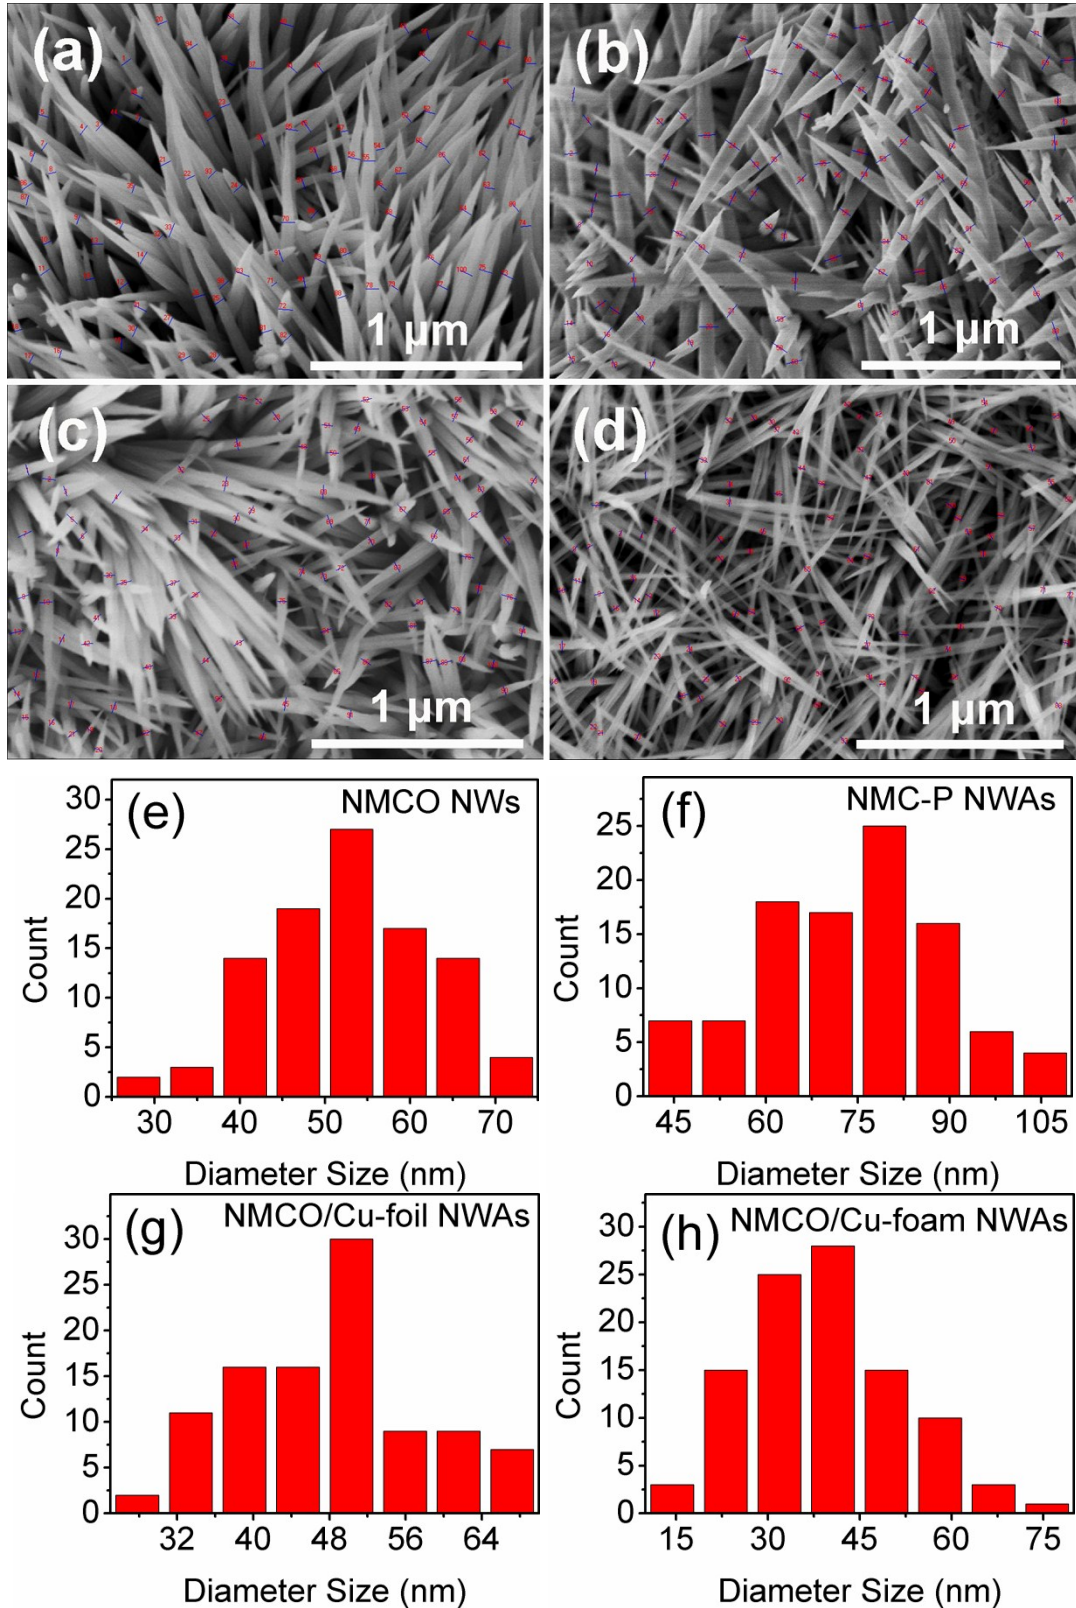

**Fig.S4** SEM image sampling and diameter frequency distribution for (a) and (e) NMCO NWs, (b) and (f) NMC-P NWAs, (c) and (g) NMCO/Cu-foil NWAs, and (d) and (h) NMCO/Cu-foam NWAs.

**Tab.S2** The average diameter of four samples counted from the SEM image of Fig. S4.

| Sample            | Average Diameter (nm) |
|-------------------|-----------------------|
| NMCO NWs          | ~53                   |
| NMC-P/Cu NWAs     | ~79                   |
| NMCO/Cu-foil NWAs | ~50                   |
| NMCO/Cu-foam NWAs | ~40                   |

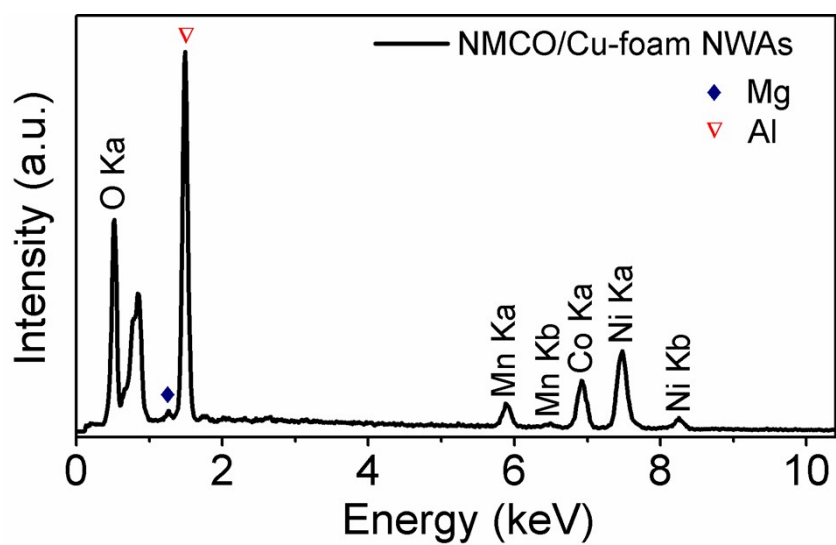

\* The Mg and Al in the EDS spectra due to the stainless steel sample stage used for SEM.

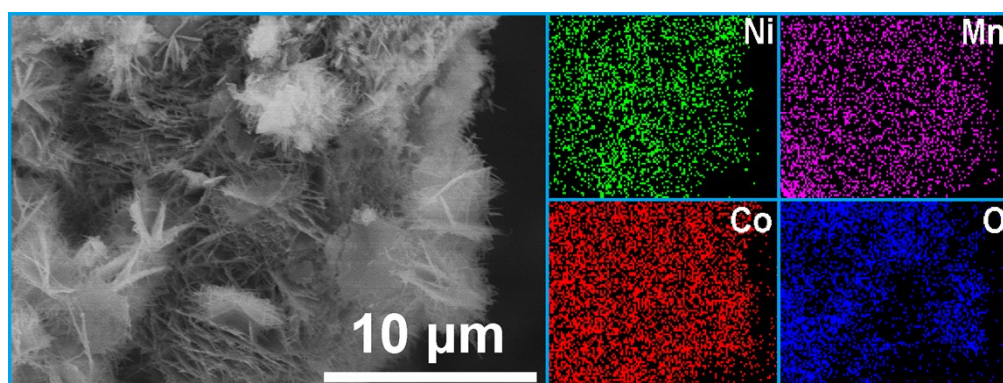

**Fig.S5** The EDS patterns of NMCO/Cu-foam NWAs and its EDS elemental mappings.

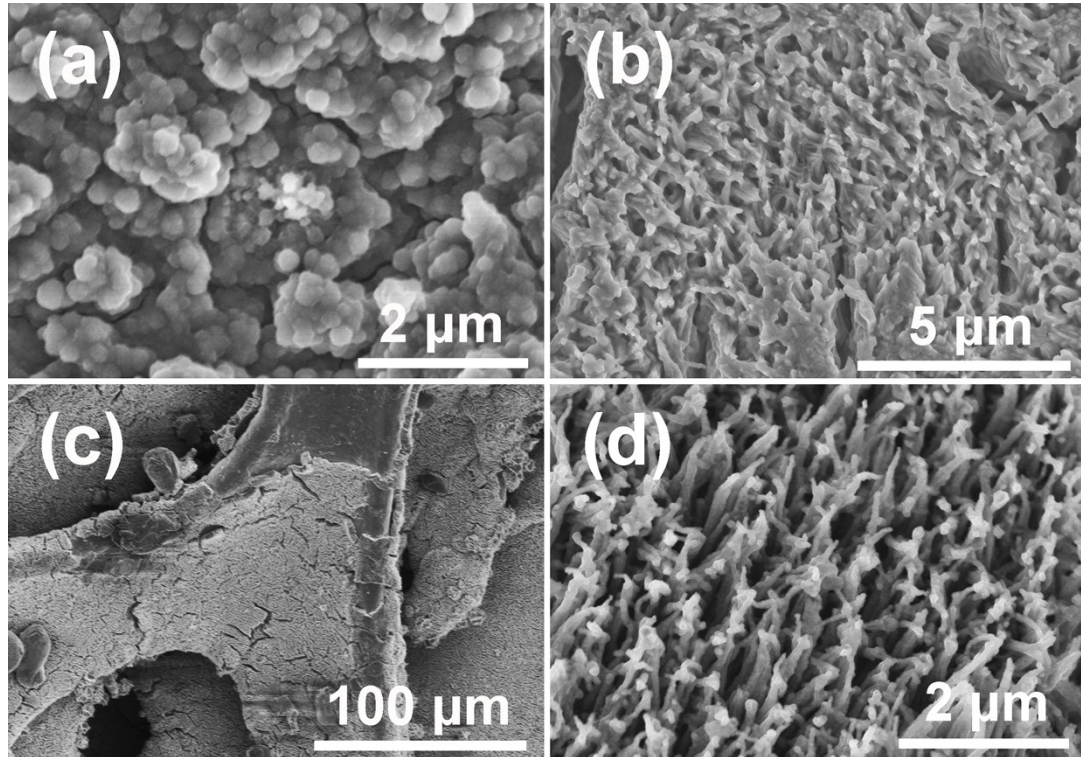

**Fig.S6** High magnification SEM images of (a) NMCO NWs and (b) NMCO/Cu-foil NWAs, and (c) Low and (d) high magnification SEM images of NMCO/Cu-foam NWAs, all after 100 cycles at  $0.2 \text{ A g}^{-1}$ .

**Tab.S3** Electrochemical performance of different TMOs electrodes.

| Type of materials                                                                                         | Initial charge capacity                               | Capacity retention rate                                                                                |
|-----------------------------------------------------------------------------------------------------------|-------------------------------------------------------|--------------------------------------------------------------------------------------------------------|
| This work                                                                                                 | $1501 \text{ mAh g}^{-1}$ at $0.2 \text{ A g}^{-1}$   | 98.2% (After 100 cycle at $0.2 \text{ A g}^{-1}$ )<br>87.2% (After 100 cycle at $1 \text{ A g}^{-1}$ ) |
| NMCO multi-shell hollow microsphere <sup>1</sup>                                                          | $1470 \text{ mAh g}^{-1}$ at $0.2 \text{ A g}^{-1}$   | 74.6% (After 250 cycle at $0.2 \text{ A g}^{-1}$ )                                                     |
| NMCO inverse opal <sup>2</sup>                                                                            | $1003 \text{ mAh g}^{-1}$ at $0.2 \text{ A g}^{-1}$   | 23% (After 100 cycle at $0.15 \text{ A g}^{-1}$ )                                                      |
| NMCO microspheres <sup>3</sup>                                                                            | $1173 \text{ mAh g}^{-1}$ at $25 \text{ mA g}^{-1}$   | 37% (After 100 cycle at $25 \text{ mA g}^{-1}$ )                                                       |
| $\text{Mn}_{0.54}\text{Ni}_{0.13}\text{Co}_{0.13}(\text{CO}_3)_{0.8}$ multi-shell-structured <sup>4</sup> | $806 \text{ mAh g}^{-1}$ at $0.25 \text{ A g}^{-1}$   | 56% (After 100 cycle at $0.25 \text{ A g}^{-1}$ )                                                      |
| $\text{NiCo}_2\text{O}_4$ microspheres <sup>5</sup>                                                       | $1198 \text{ mAh g}^{-1}$ at $0.25 \text{ A g}^{-1}$  | 59% (After 500 cycle at $0.8 \text{ A g}^{-1}$ )                                                       |
| $\text{NiCo}_2\text{O}_4$ @C fiber nanowire arrays <sup>6</sup>                                           | $1357 \text{ mAh g}^{-1}$ at $0.2 \text{ A g}^{-1}$   | 84% (After 100 cycle at $0.5 \text{ A g}^{-1}$ )                                                       |
| $\text{NiCo}_2\text{O}_4$ nanosheets@CNT composites <sup>7</sup>                                          | $1031 \text{ mAh g}^{-1}$ at $0.2 \text{ A g}^{-1}$   | a discharge capacity of $1309 \text{ mA h g}^{-1}$ after 300 cycles at $0.4 \text{ A g}^{-1}$          |
| $\text{CoNiO}_2$ nanosheets assembled flowers <sup>8</sup>                                                | $617 \text{ mAh g}^{-1}$ at $0.1 \text{ A g}^{-1}$    | 66% (After 110 cycle at $0.1 \text{ A g}^{-1}$ )                                                       |
| $\text{Co}_3\text{O}_4$ mesoporous nanoplates <sup>9</sup>                                                | $2235 \text{ mAh g}^{-1}$ at $44.5 \text{ mA g}^{-1}$ | 50% (After 100 cycle at $44.5 \text{ mA g}^{-1}$ )                                                     |
| $\text{Co}_3\text{O}_4/\text{Ni}$ foam                                                                    | $1327 \text{ mAh g}^{-1}$ at $0.2 \text{ A g}^{-1}$   | 71% (After 100 cycle at $0.2 \text{ A g}^{-1}$ )                                                       |

---

|                                                                         |                                                   |                                                    |
|-------------------------------------------------------------------------|---------------------------------------------------|----------------------------------------------------|
| nanowires <sup>10</sup>                                                 |                                                   |                                                    |
| CNTs-entangled Mn <sub>3</sub> O <sub>4</sub> octahedrons <sup>11</sup> | 780 mAh g <sup>-1</sup> at 0.19 A g <sup>-1</sup> | 83% (after 400 cycles at 468 A g <sup>-1</sup> )   |
| Mn <sub>3</sub> O <sub>4</sub> @RGO nanowires <sup>12</sup>             | 802 mAh g <sup>-1</sup> at 0.1 A g <sup>-1</sup>  | 87.5% (after 100 cycles at 0.1 A g <sup>-1</sup> ) |

---

## References

1. D. Luo, Y. P. Deng, X. Wang, G. Li, J. Wu, J. Fu, W. Lei, R. Liang, Y. Liu, Y. Ding, A. Yu and Z. Chen, *ACS Nano*, 2017, **11**, 11521-11530.
2. D. McNulty, H. Geaney and C. O'Dwyer, *Sci Rep*, 2017, **7**, 42263.
3. Z. Xie, J. Zhao and Y. Wang, *Electrochim. Acta*, 2015, **174**, 1023-1029.
4. J. Q. Zhao and Y. Wang, *J. Mater. Chem. A*, 2014, **2**.
5. J. Li, S. Xiong, Y. Liu, Z. Ju and Y. Qian, *ACS Appl. Mater. Interfaces*, 2013, **5**, 981-988.
6. L. Shen, Q. Che, H. Li and X. Zhang, *Adv. Funct. Mater.*, 2014, **24**, 2630-2637.
7. X. Xu, B. Dong, S. Ding, C. Xiao and D. Yu, *J. Mater. Chem. A*, 2014, **2**, 13069-13074.
8. Y. Liu, Y. Zhao, Y. Yu, M. Ahmad and H. Sun, *Electrochim. Acta*, 2014, **132**, 404-409.
9. D. Su, X. Xie, P. Munroe, S. Dou and G. Wang, *Sci Rep*, 2014, **4**, 6519.
10. J. Zheng and B. Zhang, *Ceram. Int.*, 2014, **40**, 11377-11380.
11. C. Xia, Y. Wang, Q. Xu, P. Sun, X. Wang, T. Wei and Y. Sun, *Nanotechnology*, 2017, **28**.
12. J. G. Wang, D. Jin, R. Zhou, X. Li, X. R. Liu, C. Shen, K. Xie, B. Li, F. Kang and B. Wei, *Acs Nano*, 2016, **10**, 6227-6234.
